# Supplementary material
Source: PubMed Central journal article supplement (PMC3242798)
Supplement: auto0711_1335SD1.pdf [file auto0711_1335SD1.pdf]

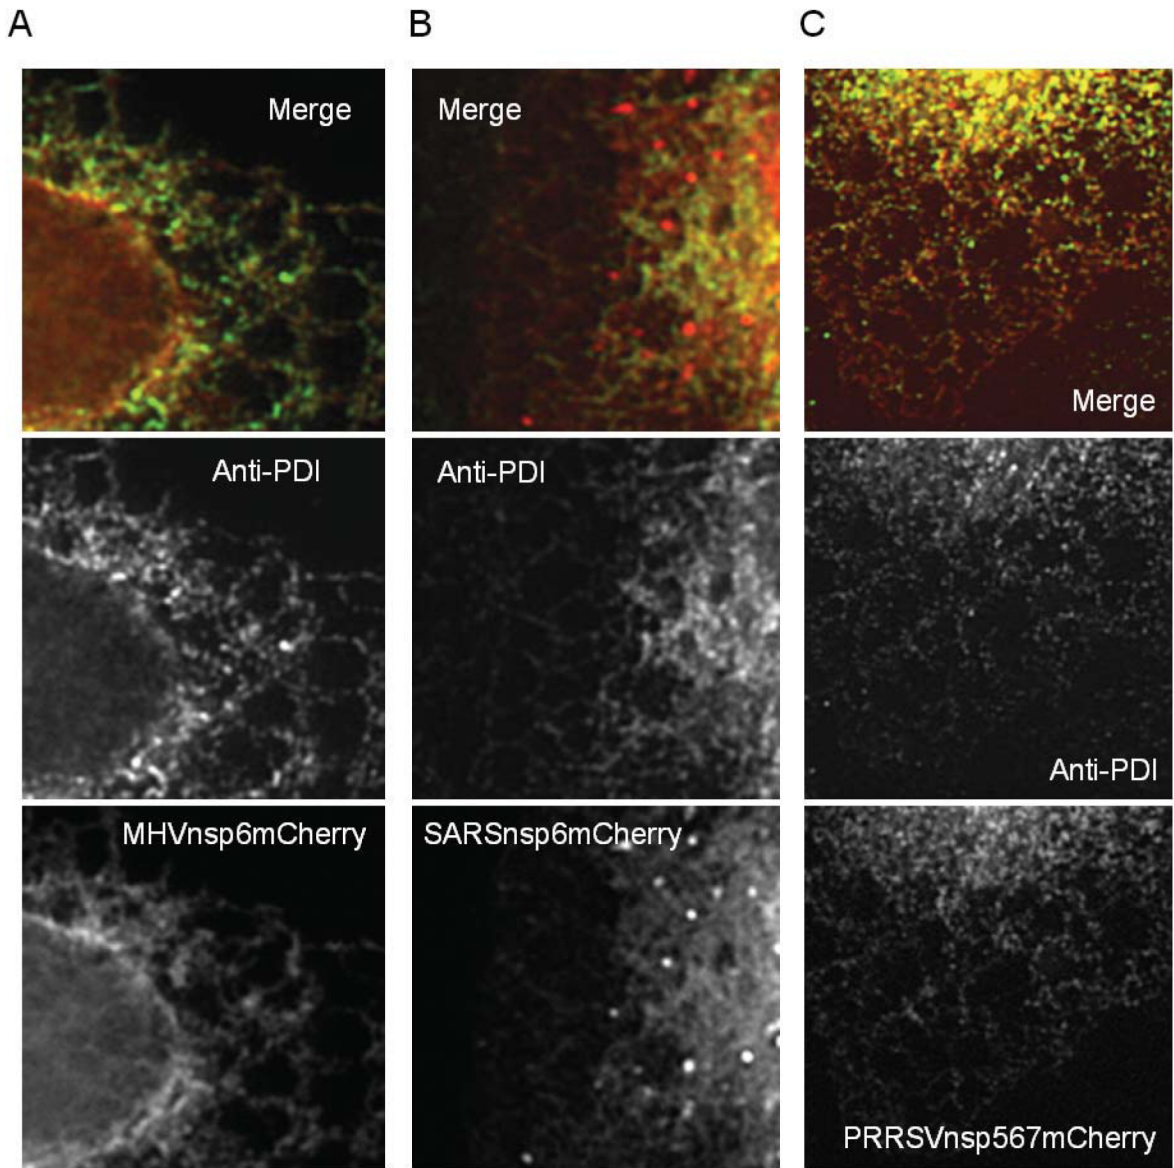

Figure S1. Nsp6 orthologs with C-terminal mCherry tags were expressed in Vero cells and immunostained using antibodies recognising protein disulphide isomerase (PDI) to identify the endoplasmic reticulum. (A–C) show the distribution of MHVnsp6mCherry and PDI (A), SARS-CoV nsp6mCherry and PDI (D), and PRRSVnsp567mCherry and PDI (C).

## Supplementary Table 1

### Primers used for PCR

| <b>NSP</b>          | <b>For/Rev</b> | <b>Primer sequence 5'→ 3'</b>            |
|---------------------|----------------|------------------------------------------|
| IBVnsp4             | For            | CCGCTCGAGACCATGGGTATTGTTAGCGGCAC         |
| IBVnsp 4            | Rev            | GTCGGGATCCCGTAATCTACTAACACCAATAG         |
| IBVnsp 5            | For            | CCGCTCGAGACCATGCAATCTGGTTTTAAGAAAC       |
| IBVnsp 5            | Rev            | GTCGGGATCCCGTTGTAATCTAACACCACCAATC       |
| IBVnsp 6            | For            | CCGCTCGAGACCATGTCTTCTTTTGTAAAGAAAAGC     |
| IBVnsp 6            | Rev            | GTCGGGATCCCGTTGAACTGTAGCAATAGG           |
| IBVnsp6 $\Delta$ CD | Rev            | GTCGGGATCCCGCCACCAATACAACCCAAAG          |
| IBVnsp 7            | For            | CCGCTCGAGACCATGGCTAAATTGAGTGATGTAAAG     |
| IBVnsp 7            | Rev            | GTCGGGATCCCGTTGTAATACAGTTGACCTC          |
| IBVnsp 8            | For            | CCGCTCGAGACCATGTCCGTTACTCAAGAATTC        |
| IBVnsp 8            | Rev            | GTCGGGATCCCGTTGCAAAACAACATCAACC          |
| IBVnsp 9            | For            | CCGCTCGAGCTACCATGAATAATGAGCTTATGCCACATGG |
| IBVnsp 9            | Rev            | GTCGGGATCCCGCTGTAAGACAACAACATTAG         |
| IBVnsp 10           | For            | CCGCTCGAGCTACCATGTCTAAAGGGCATGAAACAGAGG  |
| IBVnsp 10           | Rev            | GTCGGGATCCCGTTGAACAGAAGATTTTGGTTGTC      |
| IBVnsp 13           | For            | CCGCTCGAGCTACCATGTCTTGTGGCGTTTGTGTAGTTTG |
| IBVnsp 13           | Rev            | GTCGGGATCCCGTTGCAGACTTGTTCACTATC         |
| IBVnsp 14           | For            | CCGCTCGAGCTACCATGGGTACAGGTTTGTAAAATTTGC  |
| IBVnsp 14           | Rev            | GTCGGGATCCCGCTGGAGAGCTGAAAAAC            |
| IBVnsp 15           | For            | CCGCTCGAGCTACCATGTCTATCGACAATATTGCTTA    |
| IBVnsp 15           | Rev            | GTCGGGATCCCGTTGAAGCTGTGGATAACAT          |
| IBVnsp 16           | For            | CCGCTCGAGCTACCATGTCAGCATGGACGTGTGGTTA    |
| IBVnsp 16           | Rev            | GTCGGGATCCCGCATAGTGCACACAAAAGAG          |
| PRRSVnsp5           | For            | CATGATCTCGAGACCATGGGAGGCCTCTCCACCGTC     |
| PRRSVnsp7           | Rev            | GTACCAGGATCCGCTTCCCATTGGACTCTTCCATTCTC   |
